# Supplementary material for: Distinct Differences in Chromatin Structure at Subtelomeric X and Y' Elements in Budding Yeast
Source: PubMed Central journal article supplement (PMC2709909; doi:10.1371/journal.pone.0006363), 2009-07-23

Supplementary information figure S2 A. Rap1 binding.

Data from: Lieb JD, Liu X, Botstein D, Brown PO.  
 Nat Genet. 2001 Aug;28(4):327-34.

 X element  
 Y element

Tel I L

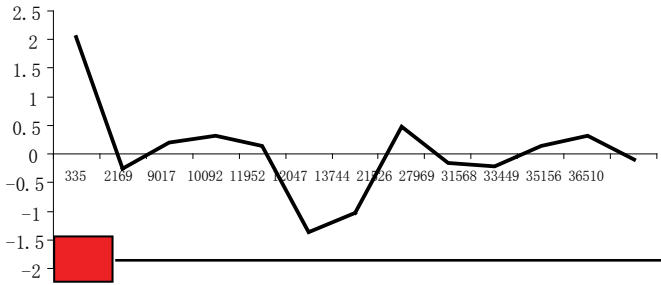

Tel VI L

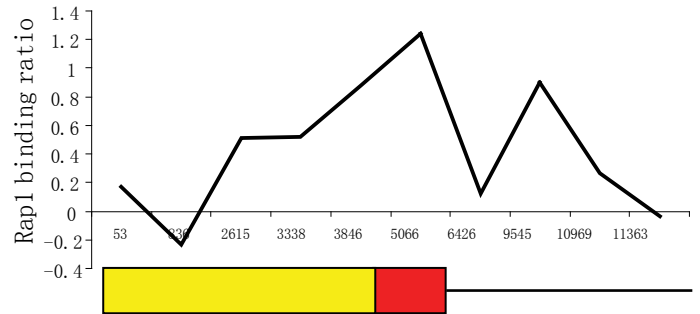

Tel II L

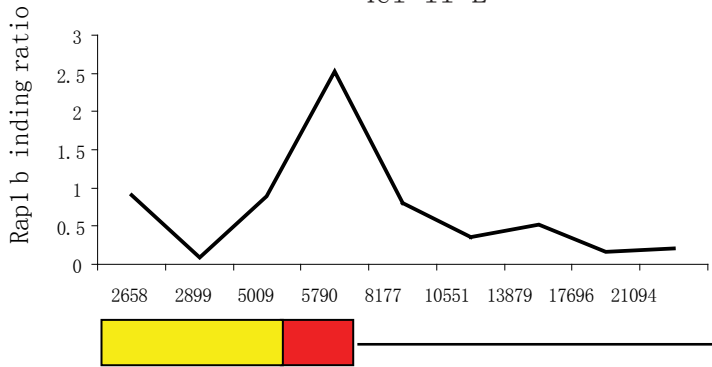

Tel VI R

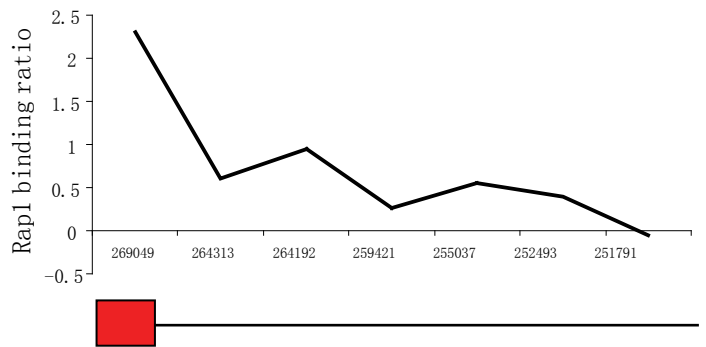

Tel IV R

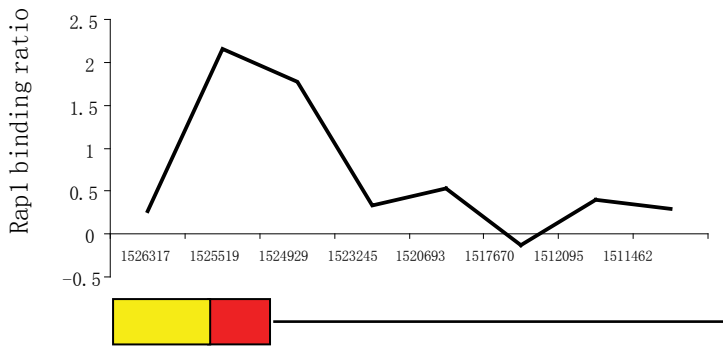

Tel VIII R

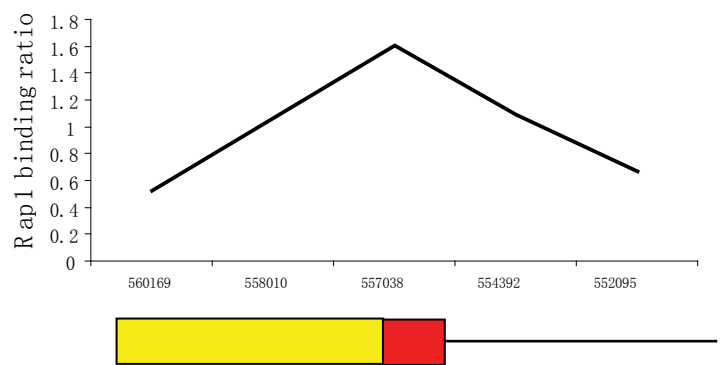

Tel V L

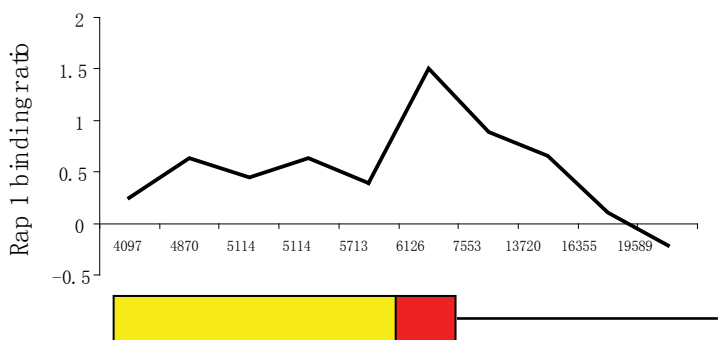

Tel X R

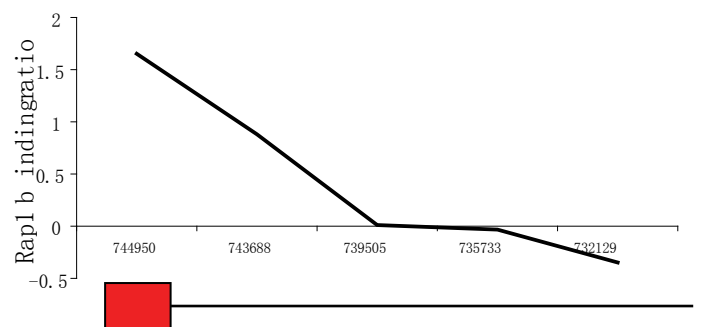

Supplementary information figure S2 B. Rap1 binding.

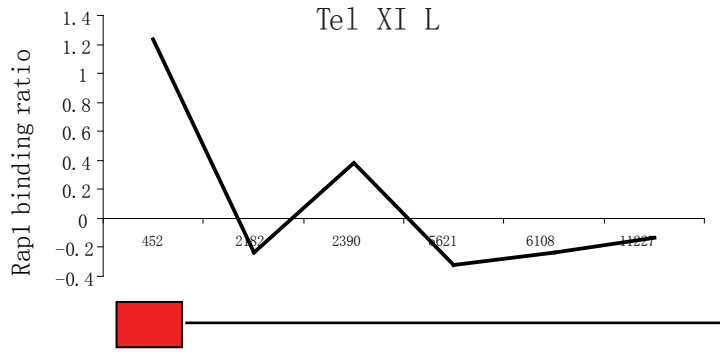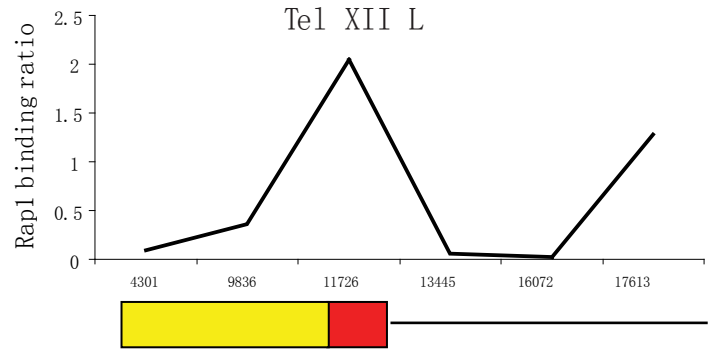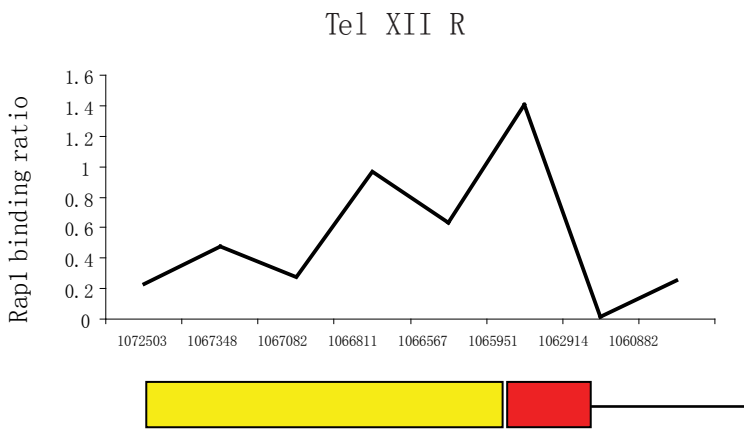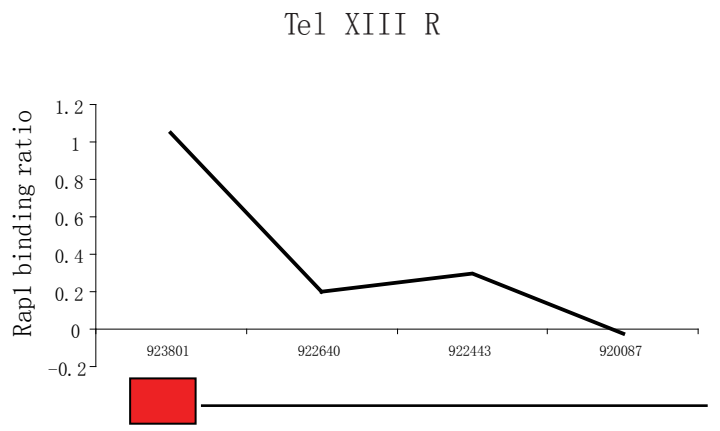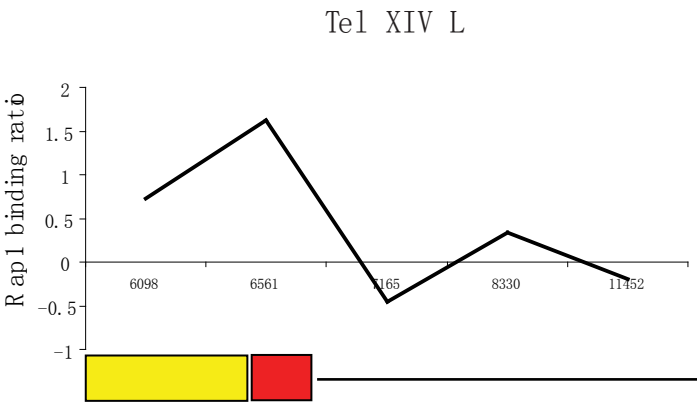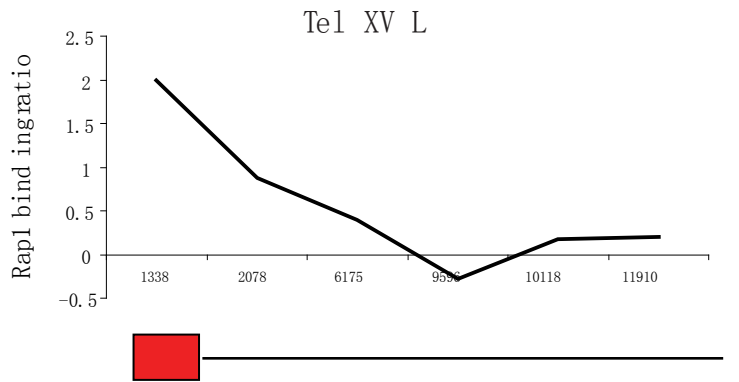

Supplement: pone.0006363.s002.pdf [file pone.0006363.s002.pdf]
