# Supplementary material for: Distinct Differences in Chromatin Structure at Subtelomeric X and Y' Elements in Budding Yeast
Source: PubMed Central journal article supplement (PMC2709909; doi:10.1371/journal.pone.0006363), 2009-07-23

Supplementary information figure S1 A. Nucleosome density

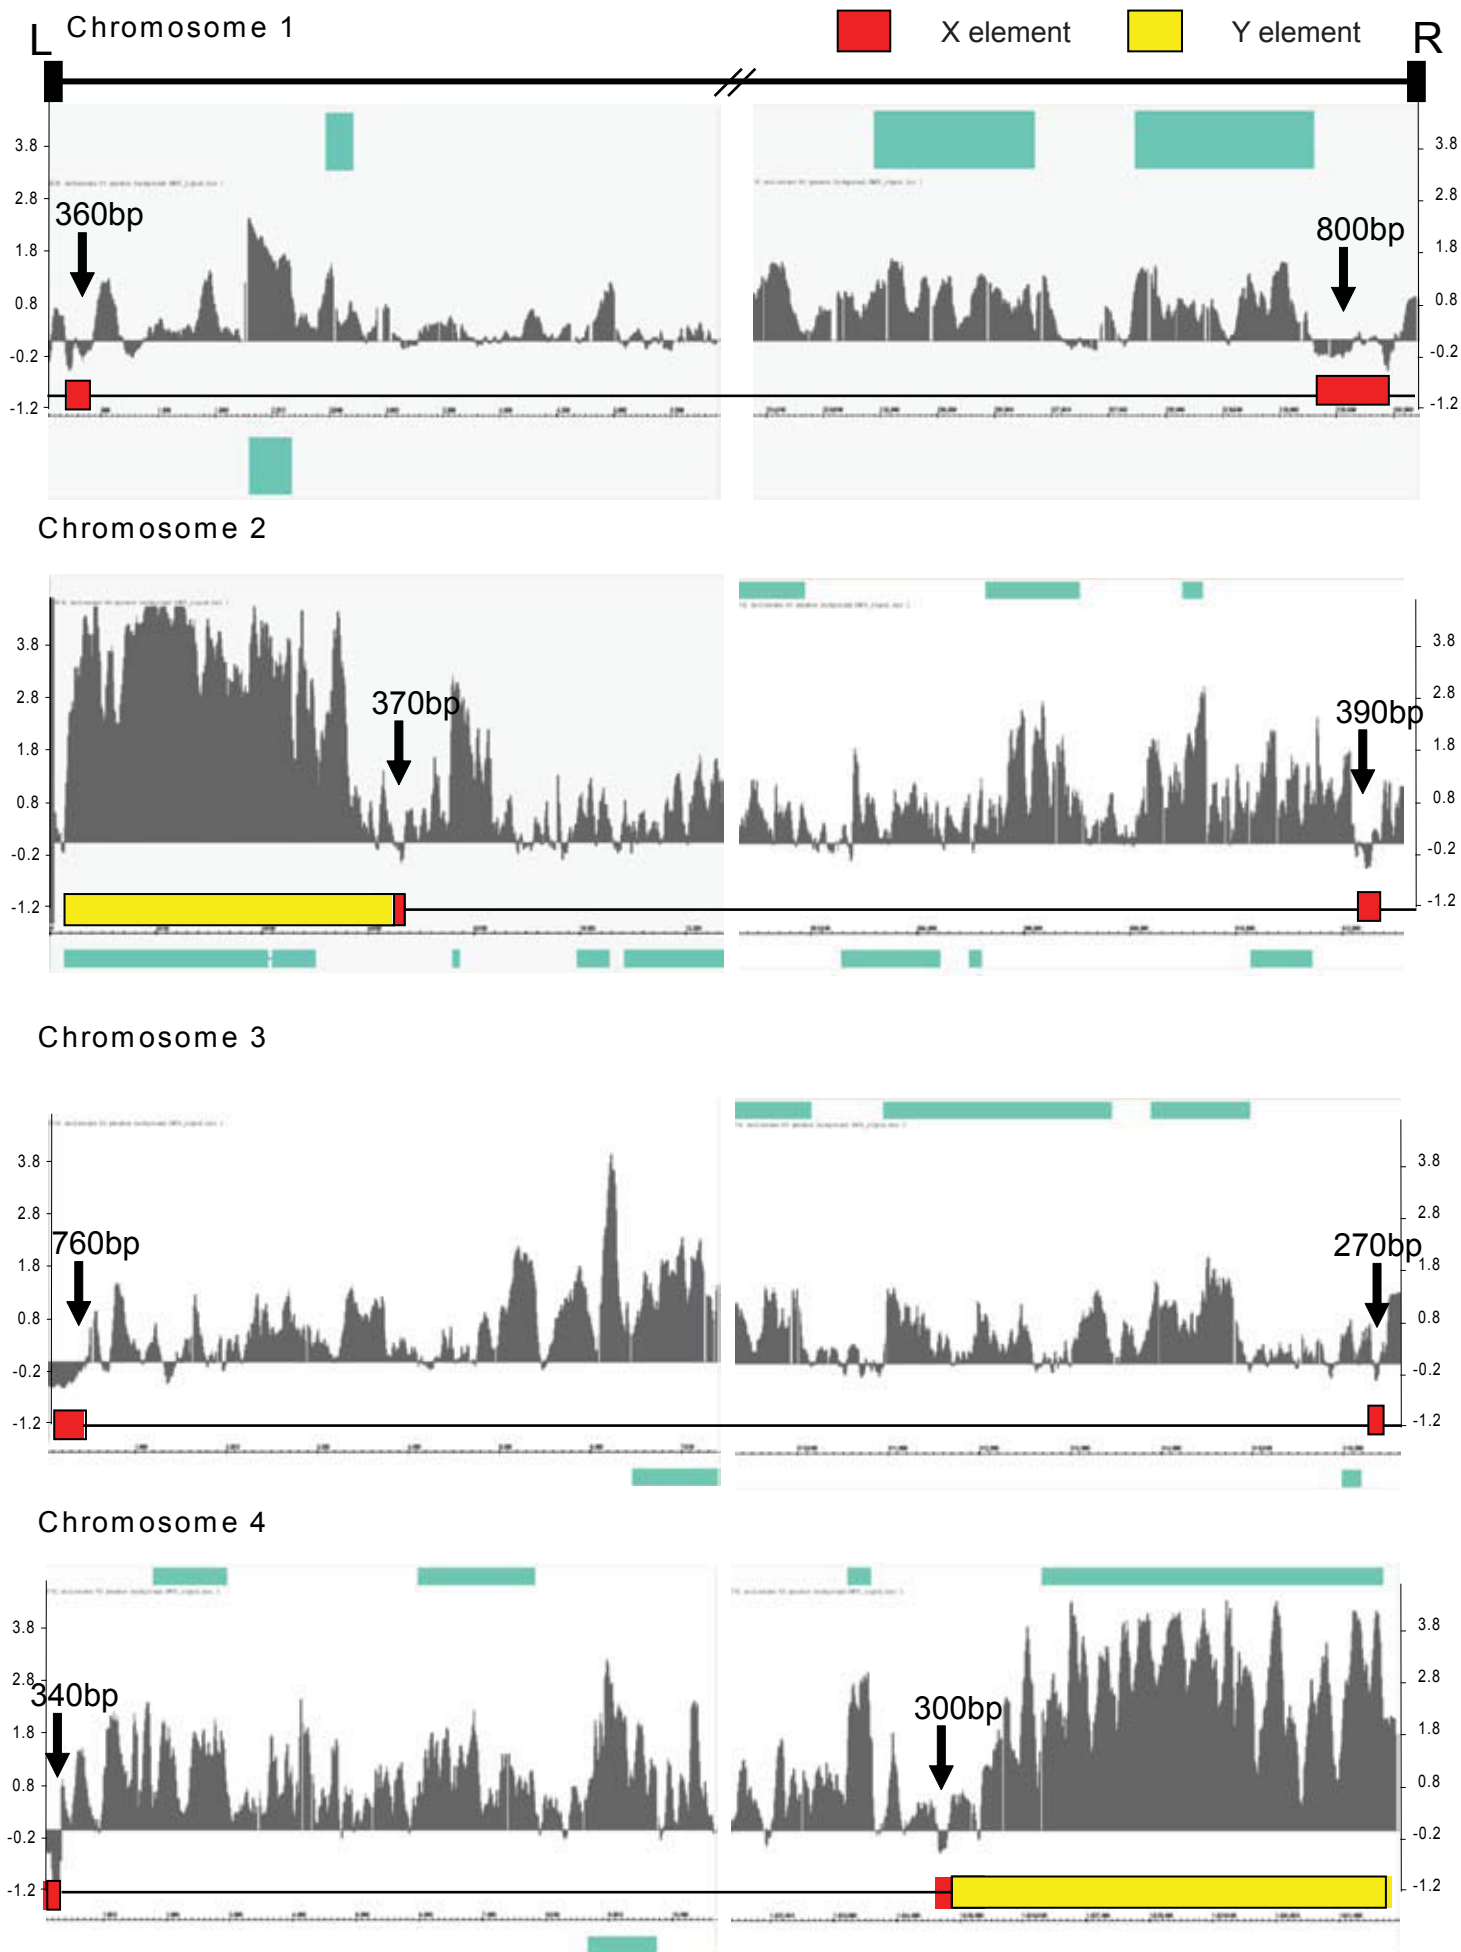

Supplementary information figure S1 B.Nucleosome density

Chromosome 5

X element Y element

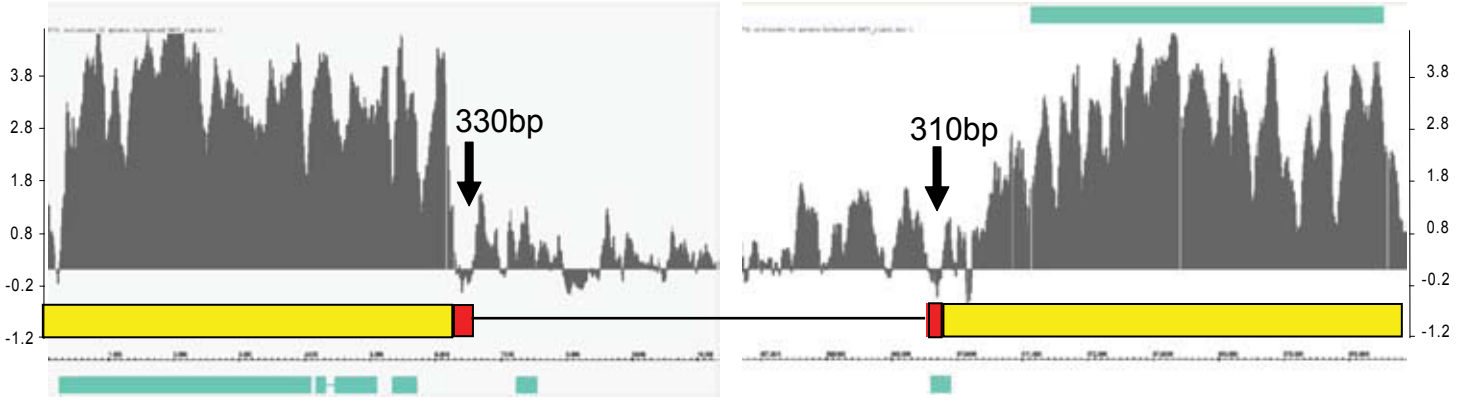

Chromosome 6

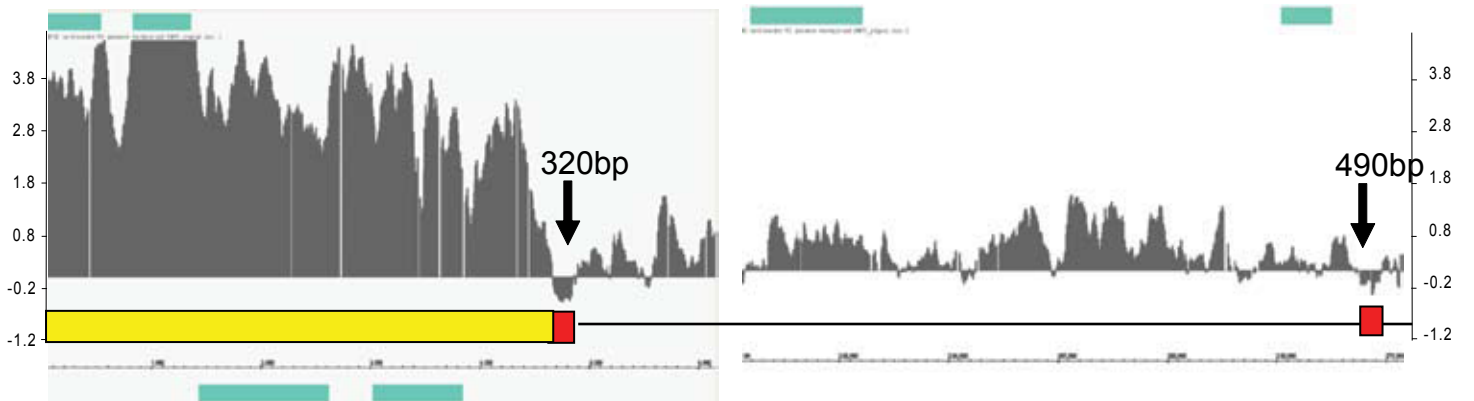

Chromosome 7

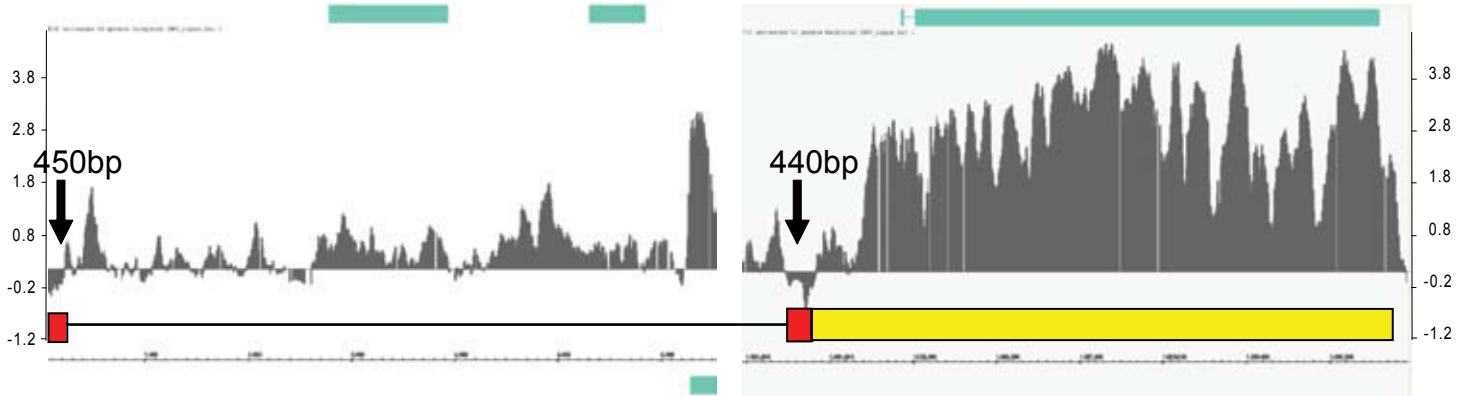

Chromosome 8

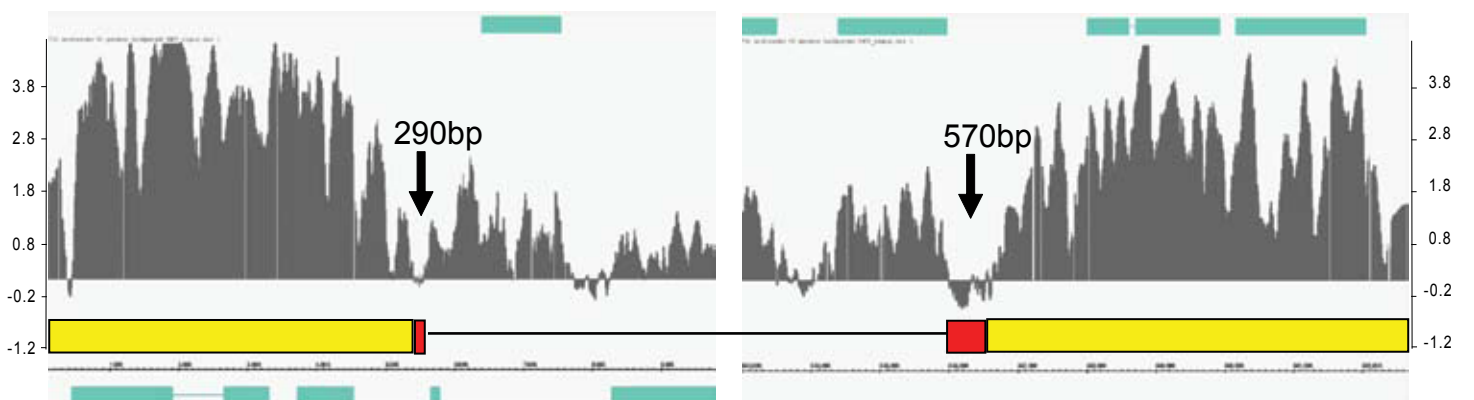

Supplementary information figure S1 C. Nucleosome density

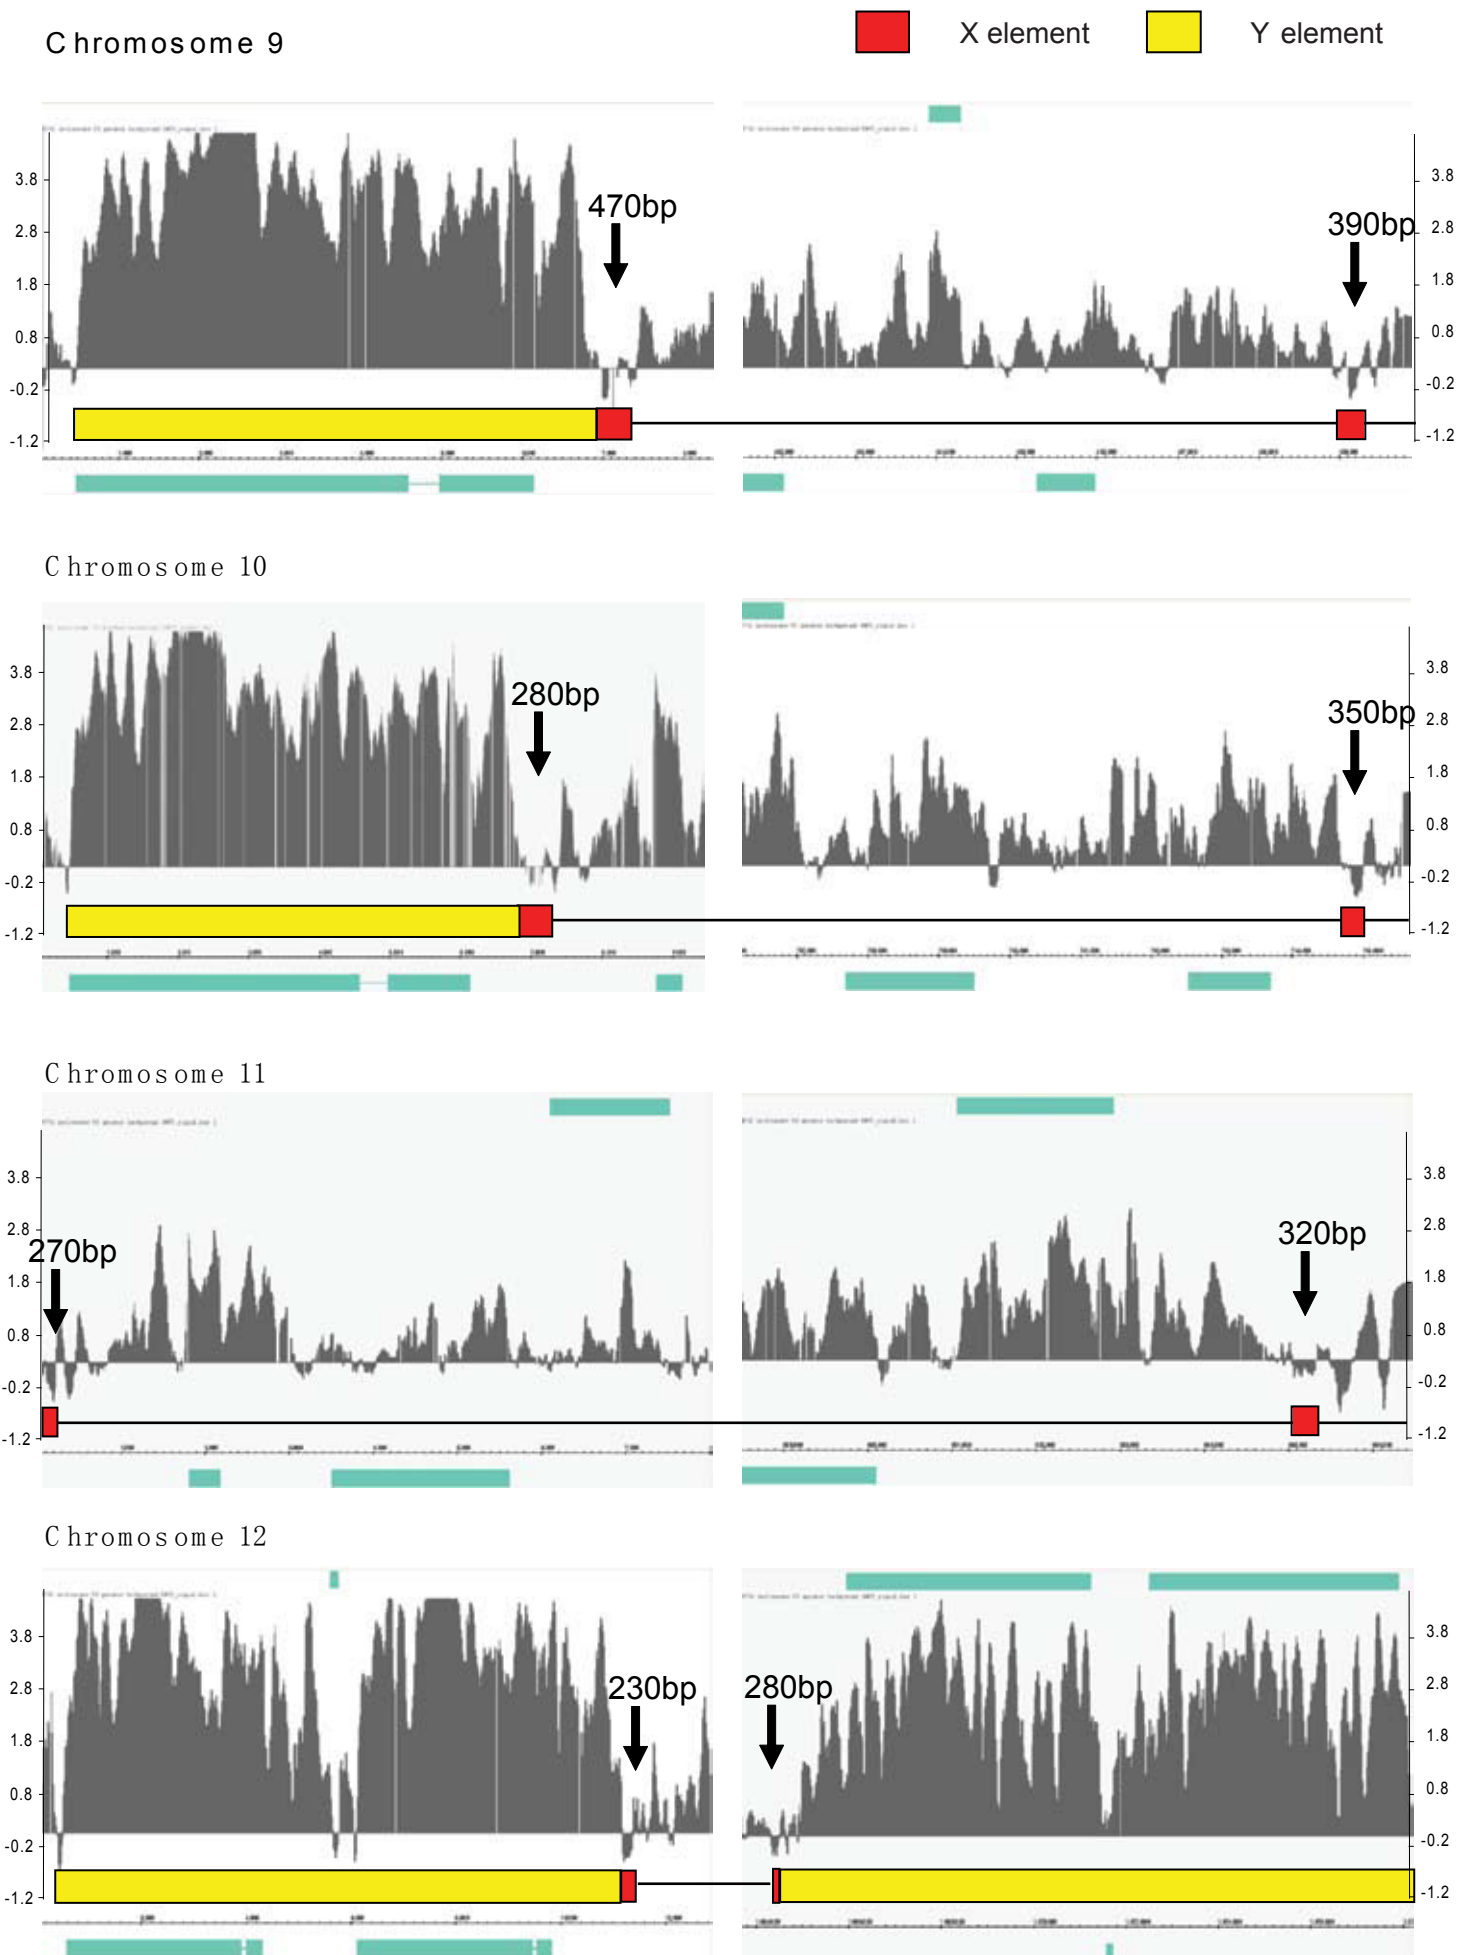

# Supplementary information figure S1 D.Nucleosome density

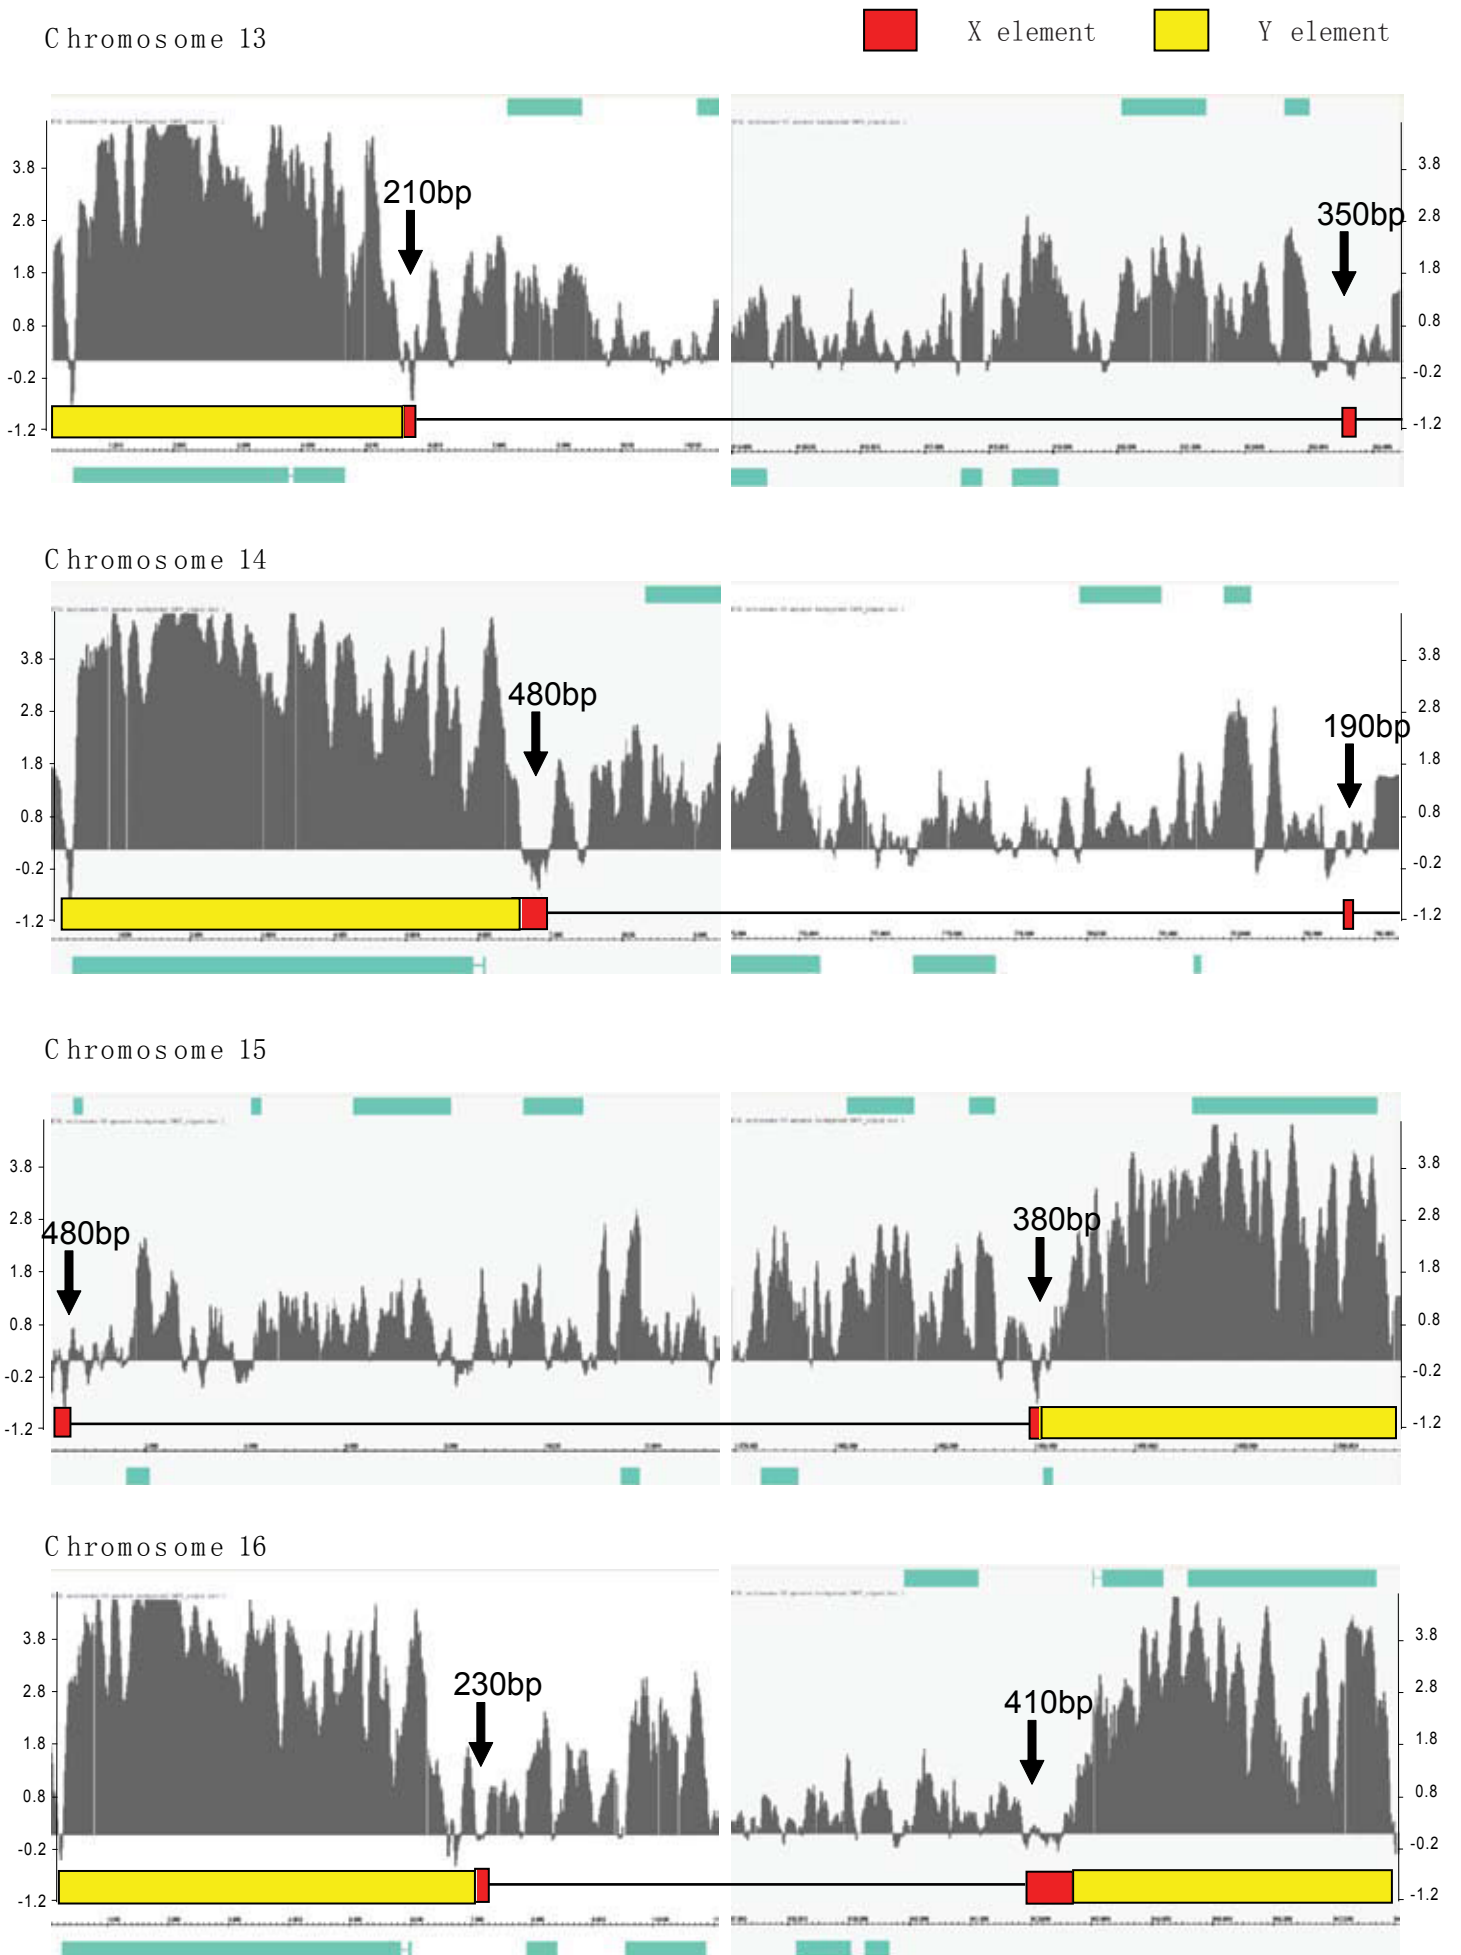

Supplement: pone.0006363.s001.pdf [file pone.0006363.s001.pdf]
