# Supplementary material for: Distinct Differences in Chromatin Structure at Subtelomeric X and Y' Elements in Budding Yeast
Source: PubMed Central journal article supplement (PMC2709909; doi:10.1371/journal.pone.0006363), 2009-07-23

# Supplementary information figure S3 A.H4K16 Acetylation

Chromosome 1

X element Y element

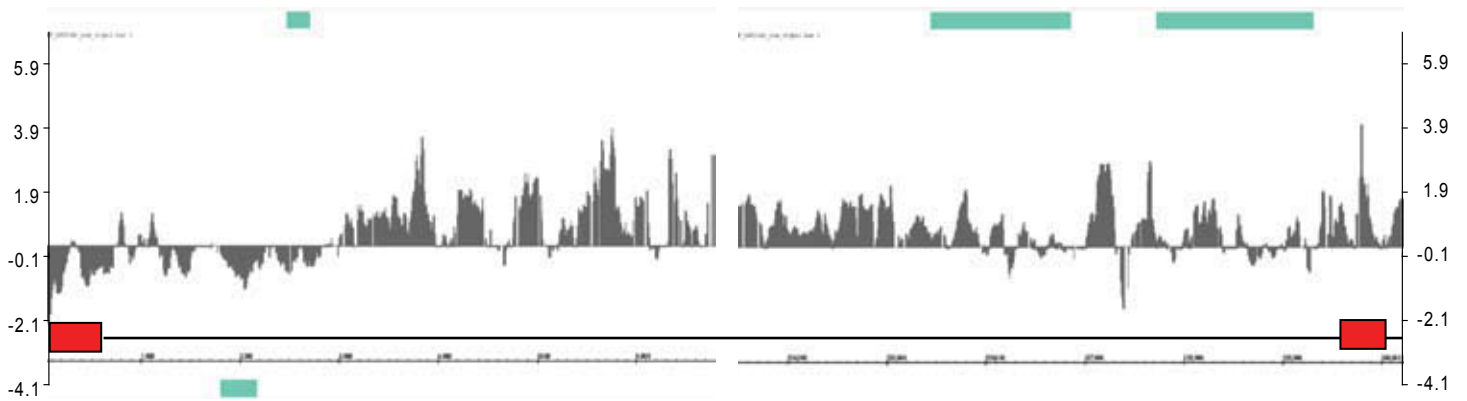

Chromosome 2

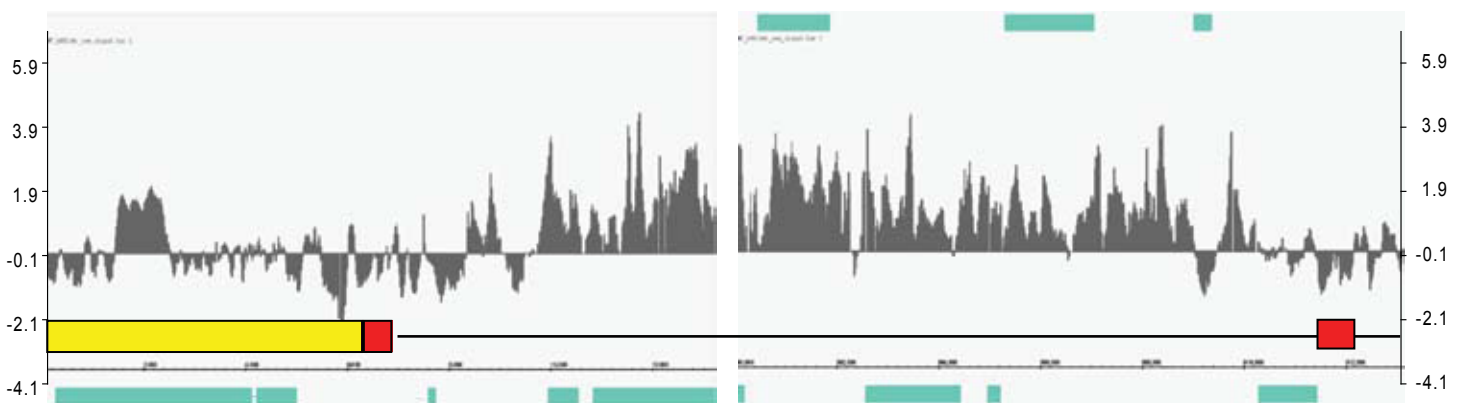

Chromosome 3

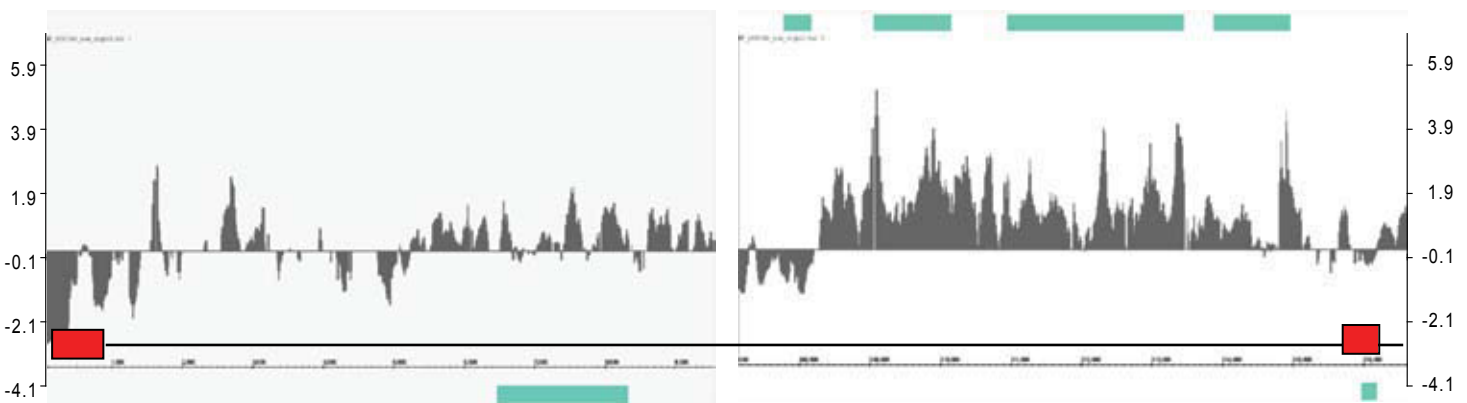

Chromosome 4

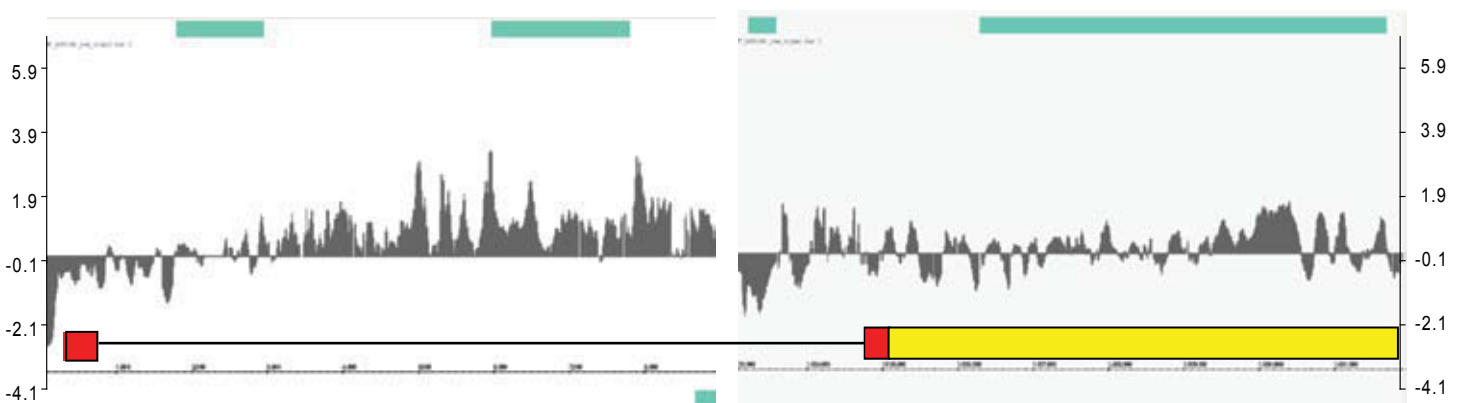

# Supplementary information figure S3 B.H4K16 Acetylation

Chromosome 5

X element Y element

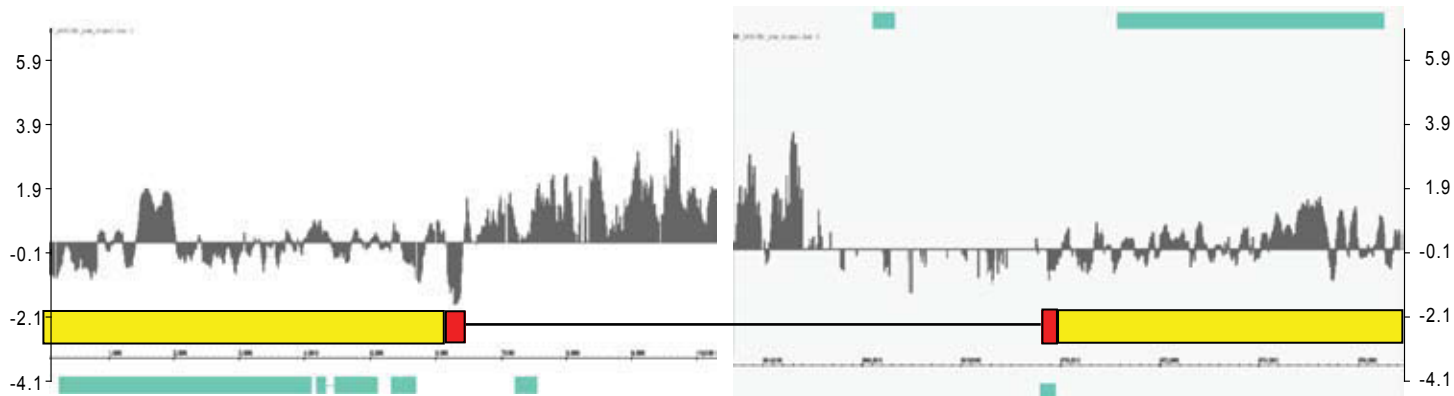

Chromosome 6

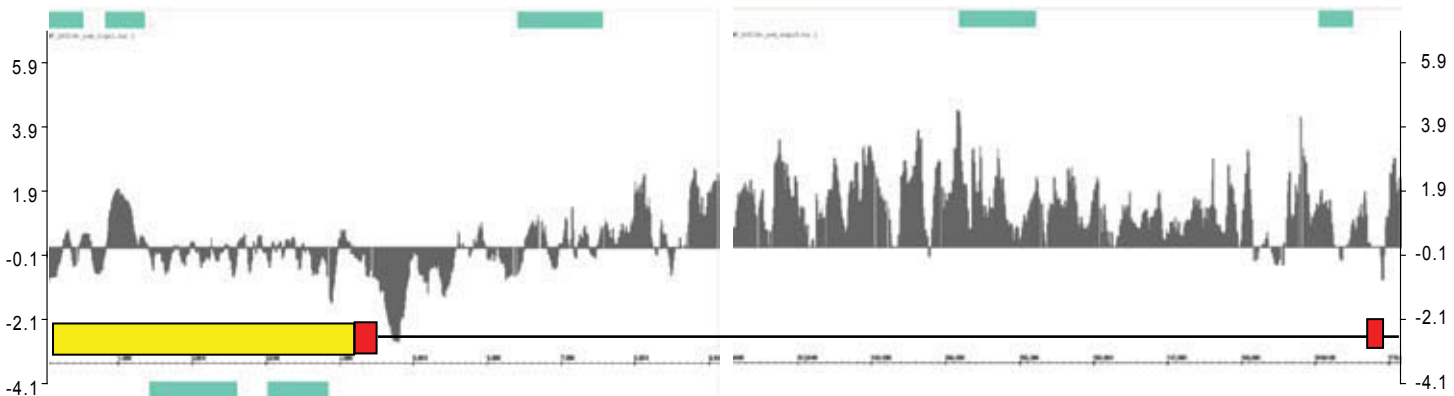

Chromosome 7

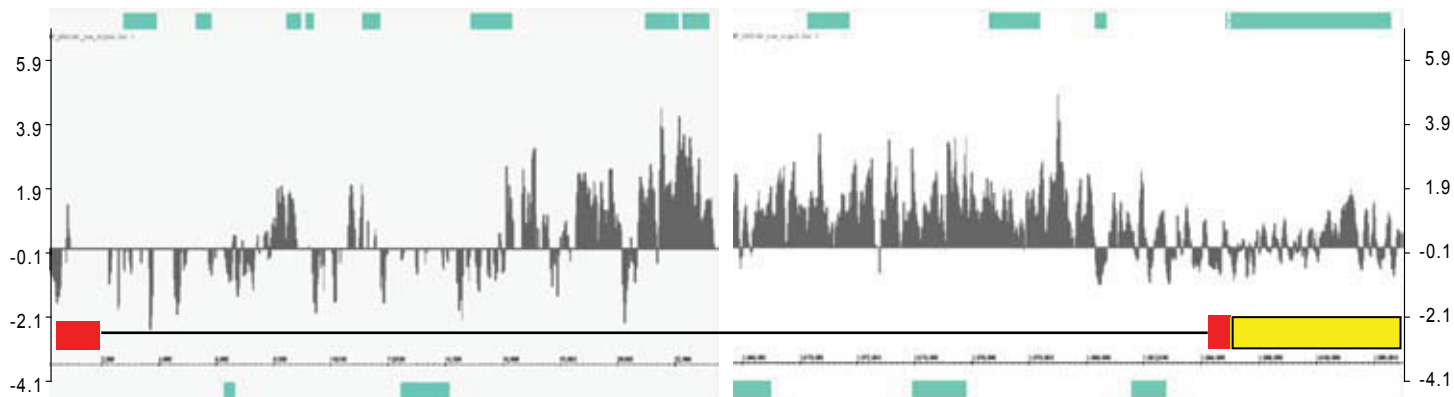

Chromosome 8

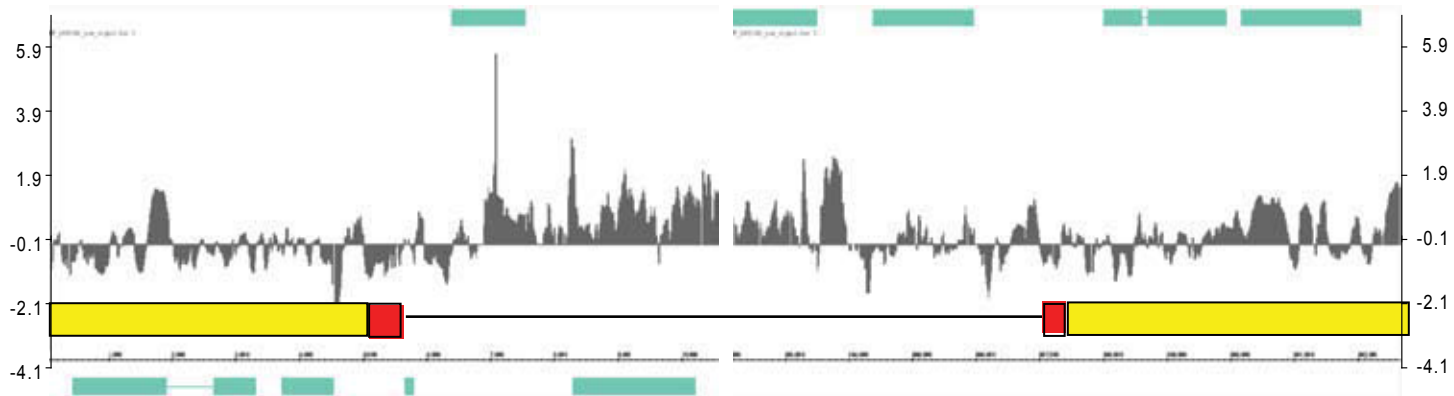

Supplementary information figure S3 C.H4K16 Acetylation

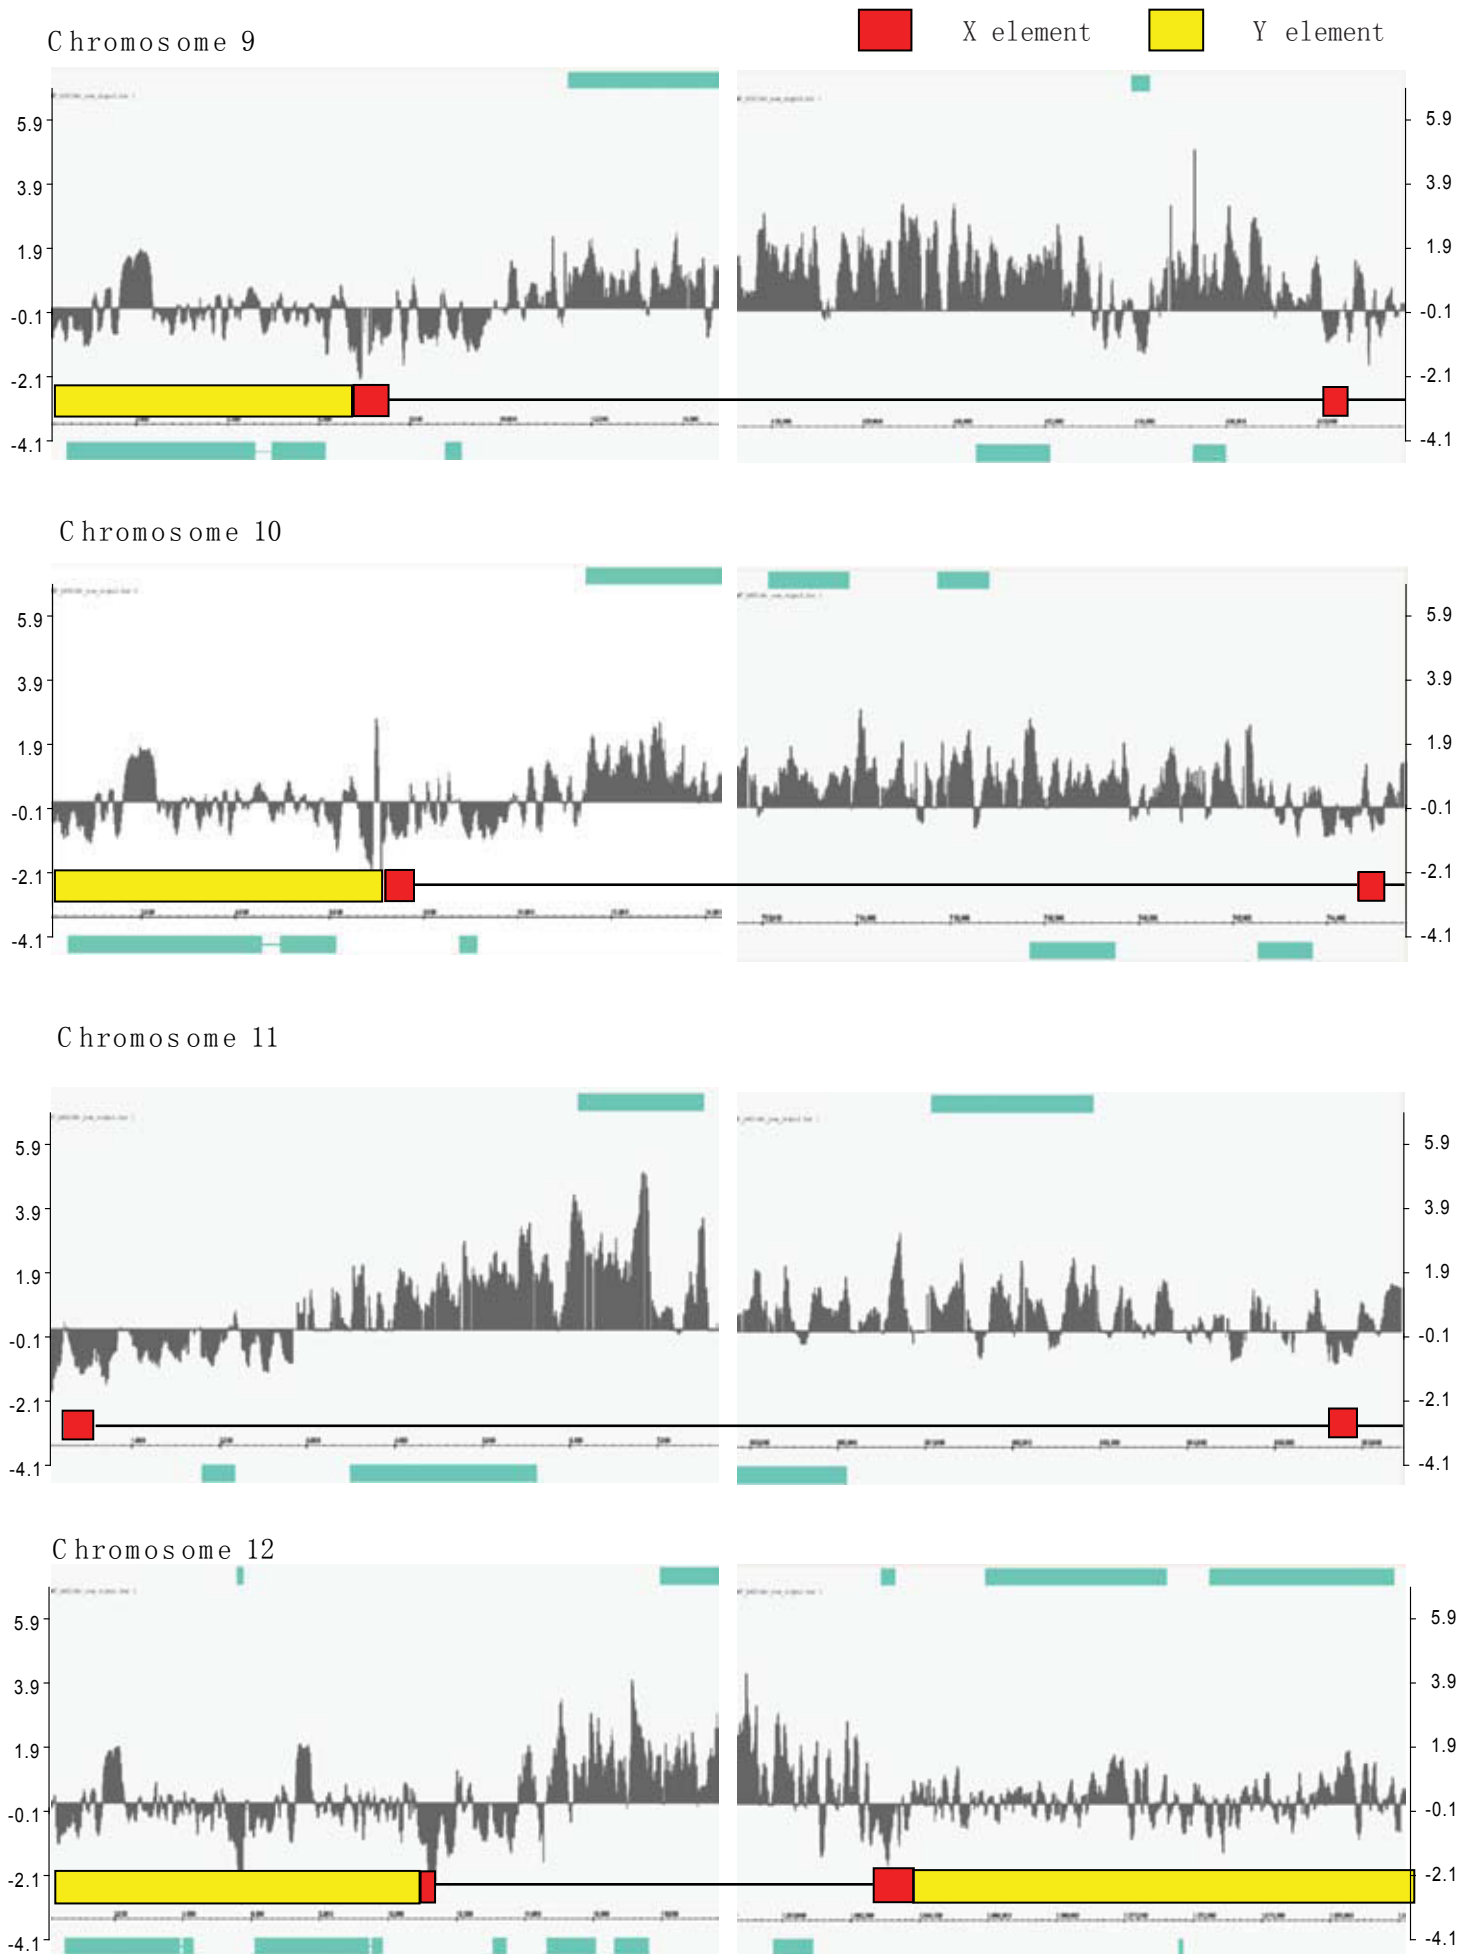

Supplementary information figure S3 D.H4K16 Acetylation

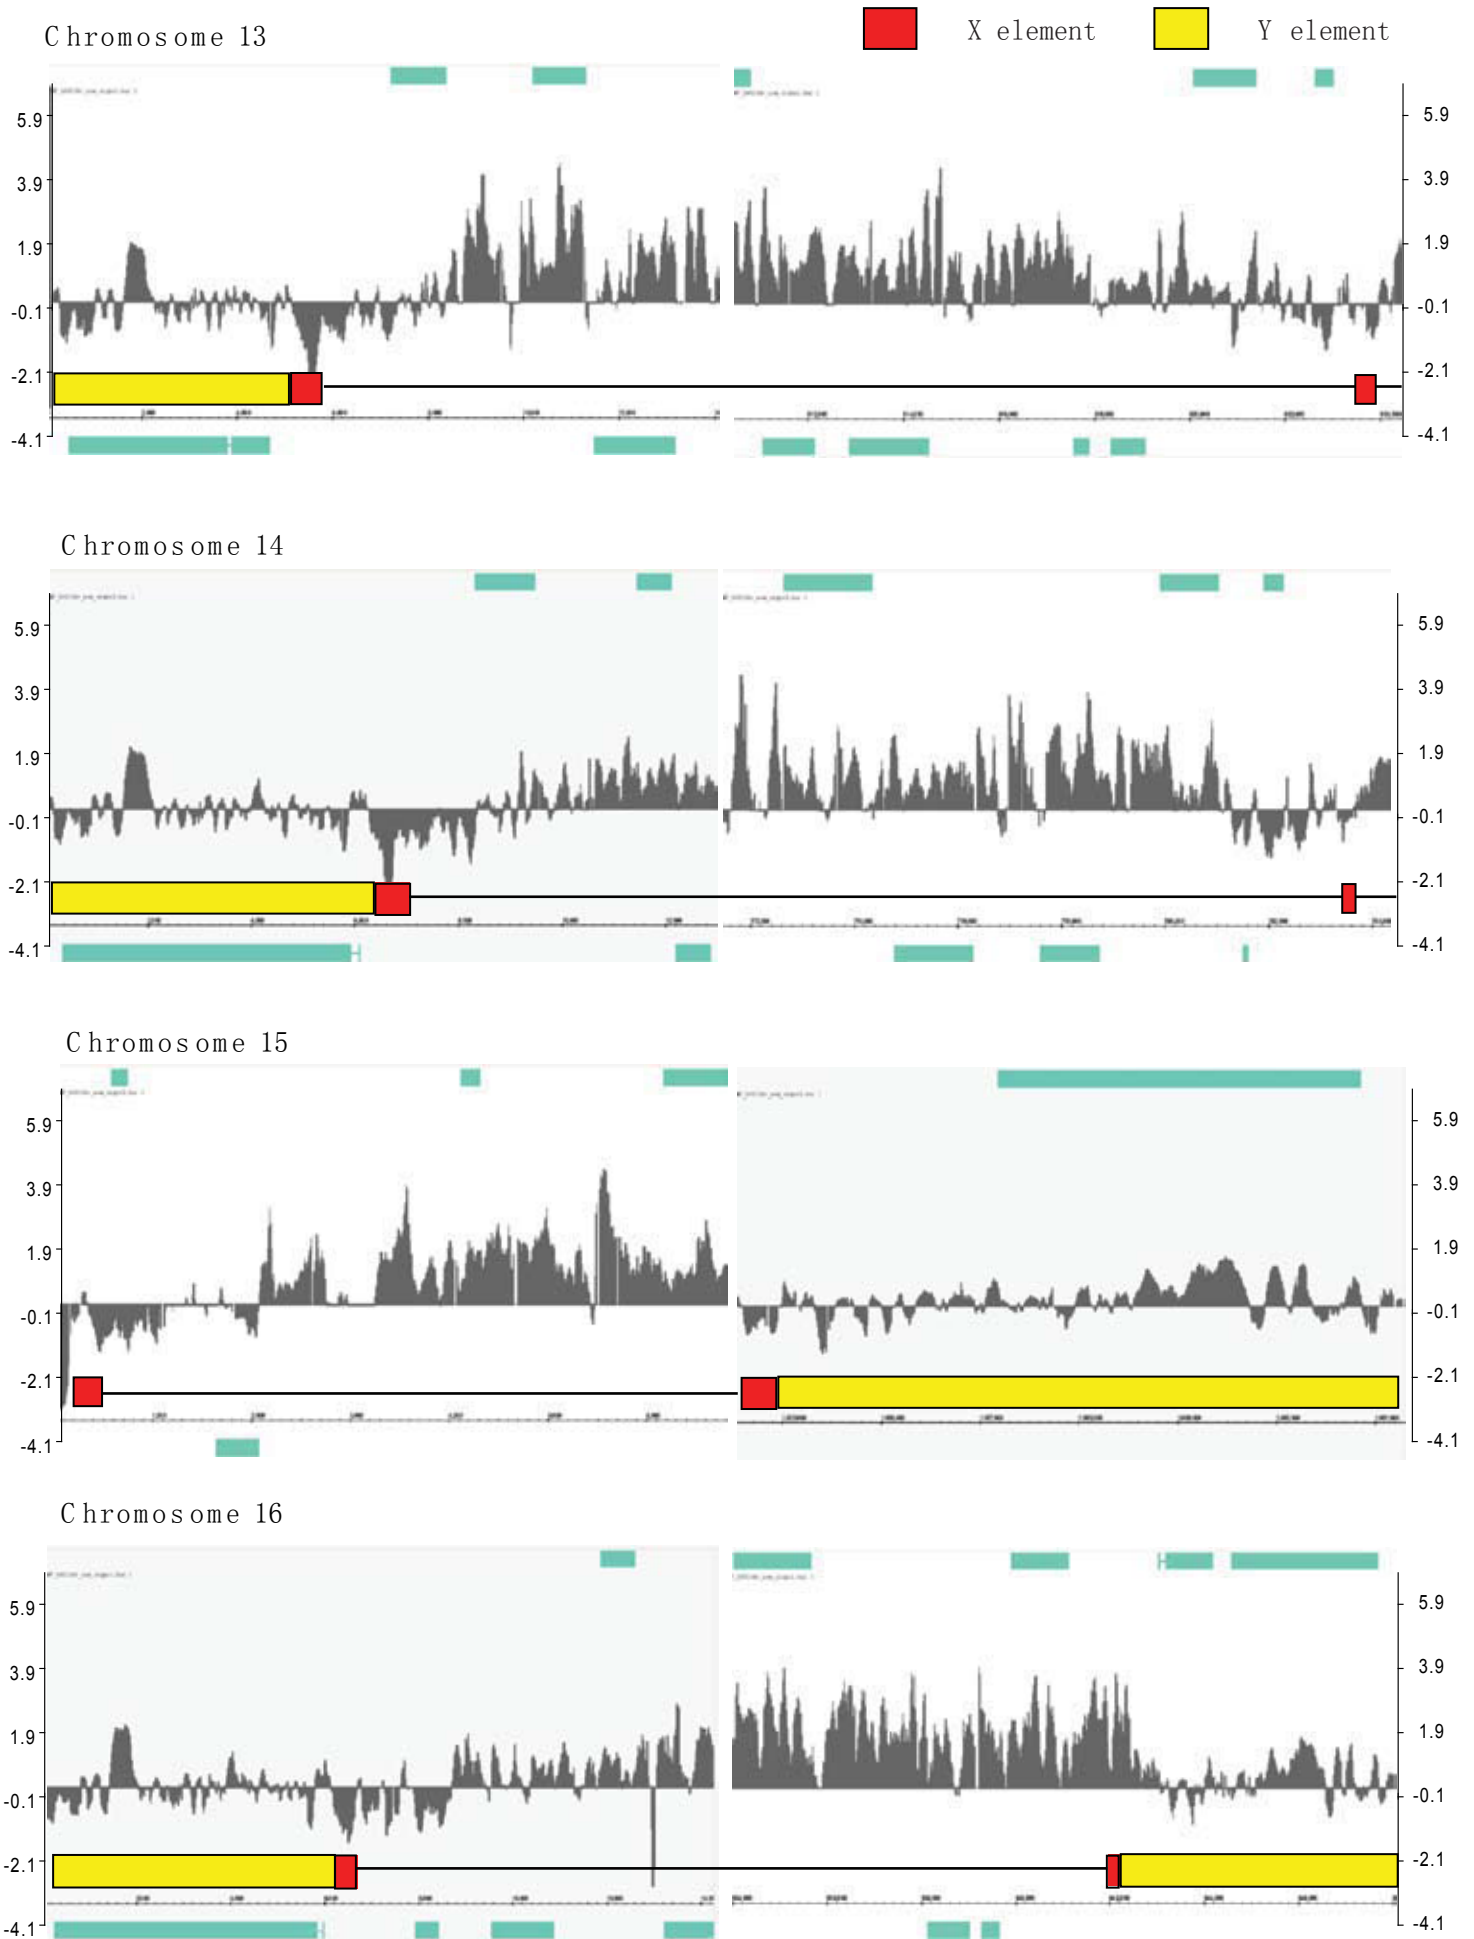

Supplement: pone.0006363.s003.pdf [file pone.0006363.s003.pdf]
