# Supplementary material for: Distinct Differences in Chromatin Structure at Subtelomeric X and Y' Elements in Budding Yeast
Source: PubMed Central journal article supplement (PMC2709909; doi:10.1371/journal.pone.0006363), 2009-07-23

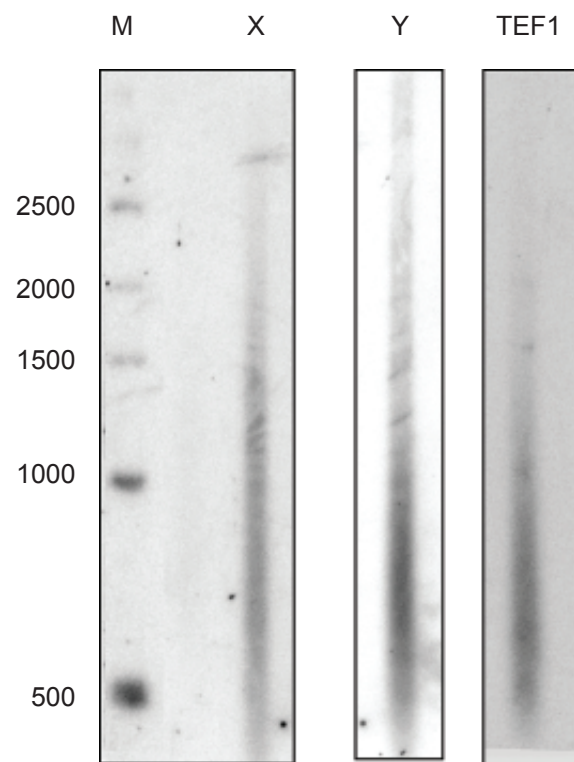

Supplement: pone.0006363.s004.pdf [file pone.0006363.s004.pdf]
