# Supplementary material for: Distinct Differences in Chromatin Structure at Subtelomeric X and Y' Elements in Budding Yeast
Source: PubMed Central journal article supplement (PMC2709909; doi:10.1371/journal.pone.0006363), 2009-07-23
Supplement: pone.0006363.s005.pdf [file pone.0006363.s005.pdf]

Table S1. All primer pairs used in the study

Histone density primer:

|       |                           |
|-------|---------------------------|
| C1RF  | TGAGGTAAGTGCCGTGGATTGTGA  |
| C1RR  | ACACCCACACACCACACCCTAATA  |
| P1F   | ACACACGTGCTTACCCTACCACTT  |
| P1R   | TGCCGTGCATAATGATGTGAGTGC  |
| P2F   | ACGGCATTCTGTGCGATGCTGATA  |
| P2R   | CAGCGAGAACTTCAACGTTTGCCA  |
| P3F   | TATTTGGGCCCCGCCGAATGAGATA |
| P3R   | ATGCACCCACATCATTATGCACGG  |
| P4F   | GCTGAGGCAAGTGCCGTGAATAAT  |
| P4R   | TGTCATACGCACACGGATGCTACA  |
| TEF1F | AATCTCTGGTTGGAACGGTGAC    |
| TEF1R | CTCAATGGCTTGTGAGTTGGTC    |

Tel 7 L primers

|              |                           |
|--------------|---------------------------|
| Tel7L0.5kF   | GCTGAGGCAAGTGCCGTGAATAAT  |
| Tel7L0.5kR   | ACTACCATCCACCGCCCATCATAA  |
| Tel7L1.5kF   | TGTCCAGCGTTGGTAAACAGTTGC  |
| Tel7L1.5kR   | ACAGCCCCGAGCCTGTACTAAATGT |
| TEL7L4KF     | CCAACTGACAAAGACGCTTGCGAA  |
| TEL7L4KR     | TGGTCTCAAATTGCGAAGAGGACG  |
| TEL7L6.5KF   | ATACTACATGTTCCAAGCCGCCCA  |
| TEL7L6.5KR   | ACATGGTGGTGAAGTCACCGTAGT  |
| TEL7L9KF     | ACGTCCGTACCATAGGTTCTTCT   |
| TEL7L9KR     | ACATTCACTGGGCCTCGTTCTACT  |
| TEL7L11.5KF  | TCAGCAGTGTCTGCCCAAGAGTTA  |
| TEL7L11.5KR  | TCCATTGGTGACGCTATGGTTCCT  |
| TEL7L14KF    | AATTGCTTGCAGCAGGTTGATGGG  |
| TEL7L14KR    | TAGACGCATGGTAAACCTCGCCAT  |
| TEL7L 16.5KF | AGGCACACGCATAATTGACG      |
| TEL7L 16.5KR | GCCTGCCATTTGACTAACCCAGTT  |
| TEL7L 19KF   | AGATGAAACGACTTGCTGTGCTGC  |
| TEL7L 19KR   | AACTTCACGCCACGTTGAGAGTA   |

X-Y elements primers

|           |                           |
|-----------|---------------------------|
| Y1 0.8KF  | ACGGCATTCTGTGCGATGCTGATA  |
| Y1 0.8KR  | ATGTGGTAACAACCACACCTCCGA  |
| Y2 1.8KF  | TGCTAGCACCAACTCCAGCACTAA  |
| Y2 1.8KR  | TTATTGGCGTCCTCCTTGCCACTA  |
| Y3 3.0KF  | TCAAACGGTCGGAAGATCTCAGCA  |
| Y3 3.0KR  | AAGGCACCTCGGATTTCTCCTTGA  |
| X 6.0K F  | TATTTGGGCCCCGCCGAATGAGATA |
| X 6.0K R  | AGCGGTCTATACCCTGTGCCATTT  |
| IMD27.3KF | CCAGGGAACAAGCTGCCAATTTGA  |
| IMD27.3KR | TGTGGCCTACCACAAGCCATAACT  |

transcription abundance standard primers

|          |                           |
|----------|---------------------------|
| YHR021CF | GATTTGTTGCACCCAACCTGCTGCT |
| YHR021CR | TGGTGATGTTCAAACAACCTGGGC  |

|          |                          |
|----------|--------------------------|
| YDR418WF | GCCAAGGCCACCAAGGAATTCAAA |
| YDR418WR | GCAGATGGAACAACAGAAGCAGCA |
| YGL245WF | ACGATCCAAGGTTCCCAACTGTCA |
| YGL245WR | ACTGGGTTGACGATAGCAGTGTGT |
| YDL218WF | GCATGTAATTCTTCTCAGGCGGCA |
| YDL218WR | CGCTTCTCCACATTCCTTGGGTTT |
| Act1F    | ACGTTCCAGCCTTCTACGTTTCCA |
| Act1R    | ACGTGAGTAACACCATCACCGGAA |

Transcription primers

|          |                           |
|----------|---------------------------|
| YRF1-1F  | AGGCCGGAAATCAAGCGATGAATG  |
| YRF1-1R  | GCAAATCTCCAGCAGCAGCAAAGA  |
| FLO1F    | AGAGCTCTGCAGCAGGGTTAATCT  |
| FLO1R    | CCGGAAGAGAGCTTACATCAACGA  |
| YLL067cF | TGAAGACGAACCAGATTTCCAGGG  |
| YLL067cR | AAGTACGCATCGTAGAGCTGTCTGT |
| YHR219WF | TGCTAGCACCAACTCCAGCACTAA  |
| YHR219WR | TTATTGGCGTCCTCCTTGGCACTA  |
| YHR218WF | TCAAACGGTCCGGAAGATCTCAGCA |
| YHR218WR | AAGGCACCTCGGATTTCTCCTTGA  |
| YHR217F  | TATTTGGGCCCGCCGAATGAGATA  |
| YHR217R  | AGCGGTCTATACCCTGTGCCATTT  |
| YFL063F  | GCATACGCACACGGATGCTACAAT  |
| YFL063R  | CCGTGCATAATGATGTGGGTGCAT  |

For sir3 occupancy primer

|        |                          |
|--------|--------------------------|
| HMR-EF | CCCGTCCAAGTTATGAGCTTAATC |
| HMR-ER | TTTTTCGGAATCGAGAATCTTCGT |

Note:

P1 amplified C1L,5R and C13R;

P2 amplified a subset of Y' elements in C2L, C4R, C7R, C8L&R, C9L, C12L&R, C13L, C14L, C15R, and C16L&R.

P3 amplified C2L, C3R, C4L, C5R, C7R, C8L, C9L, C10L&R, C11R and C14R.

P4 amplified C3L, C4L&R, C5R, C7L, C9L, C10L, C11R, C12R, C13L&R and C15R.
